# Supplementary material for: Impact of spinal cord stimulation on sick leave and disability pension in patients with chronic neuropathic pain: a real-world evidence study in Sweden
Source: PubMed Central journal article supplement — Pain. 2022 Aug 15;164(3):666–73. doi: 10.1097/j.pain.0000000000002756 (PMC9916044; doi:10.1097/j.pain.0000000000002756), 2022-08-15
Supplement: jop-164-0666-s001.pdf [file jop-164-0666-s001.pdf]

## SUPPLEMENTARY DATA

**Supplementary Table 1. Previous spine surgeries identified using ICD-10 and NOMESCO surgical procedure code (NCSP)**

| Diagnosis                              | Surgical procedure                      | Main diagnosis code (ICD-10)     | NCSP code               |
|----------------------------------------|-----------------------------------------|----------------------------------|-------------------------|
| Disc herniation                        | Discectomy                              | M511/M511K                       | ABC16/ABC26             |
| Spinal stenosis decompression          | Decompression                           | M480/M480K/M480J/M511/M511K/M672 | ABC36/ABC56/ABC66/NAM39 |
| Spinal stenosis fusion + decompression | Fusion + decompression                  | M480/M480K/M480J/M672            | NAG*                    |
|                                        |                                         | M960/M960K/M960J                 | NAG*                    |
| Segmental dysfunction                  | Fusion/Disc prosthesis                  | M990                             | NAG*/NAB*               |
|                                        |                                         | M960/M960K                       | NAG*/NAB*               |
| Spondylolisthesis                      | Fusion + decompression                  | M430/M431/Q762                   | NAG*                    |
|                                        |                                         | M960/M960K                       | NAG*                    |
| Myelopathy                             | Fusion + decompression, Disc prosthesis | M500/M471                        | NAG*/NAB90/NAC90        |
|                                        |                                         | M960/M960A                       | NAG*/NAB90/NAC90        |
| Rhizopathy                             | Fusion + decompression, Disc prosthesis | M501/M472                        | NAG*/NAB90/NAC90        |
|                                        |                                         | M960A                            | NAG*/NAB90/NAC90        |
| Degenerative deformity                 | Fusion, arthroplasty                    | M403/M415/M418/M419/M438/M439    | NAG*/NAT*               |
|                                        |                                         | M960/M960K/M960J                 | NAG*/NAT*               |

**Supplementary Table 2. Sensitivity analysis: Including only sick leave**

| Variable                                                                 | Coefficient (standard error) | Interaction effect of potential predictors & treatment effect (predictor* $\tau_{DID}$ ) |
|--------------------------------------------------------------------------|------------------------------|------------------------------------------------------------------------------------------|
| SCS group effect, $\beta_2$                                              | 73.8 (4.9)***                |                                                                                          |
| Period effect, $\beta_1$ (1 if after index date, 0 if before index date) | 0.7 (0.7)                    |                                                                                          |
| <b>Treatment effect, <math>\tau_{DID}</math></b>                         | <b>-39.0 (4.4)***</b>        |                                                                                          |
| Calendar year                                                            | 0.4 (0.2)**                  |                                                                                          |
| <b>Predictors</b>                                                        |                              |                                                                                          |
| Age                                                                      | -0.3 (0.1)***                | 0.2 (0.5)                                                                                |
| Male                                                                     | -2.7 (1.3)**                 | -11.1 (8.8)                                                                              |
| Comorbidities                                                            | 2.2 (1.1) **                 | 5.7 (3.4)                                                                                |
| Any opioid use 3 months before index date                                | 25.2 (13.4)*                 | 5.5 (11.5)                                                                               |
| Use of strong opioid 3 months before index date                          | -6.0 (11.3)                  | -27.5 (25.3)                                                                             |
| Use of weak opioid 3 months before index date                            | -16.3 (12.5)                 | 16.8 (12.0)                                                                              |
| Any non-opioid pain medicine use 3 months before index date              | 17.3 (3.8)***                | 10.7 (10.4)                                                                              |
| Any anti-depression medicine use 3 months before index date              | 18.6 (3.3)***                | 12.5 (10.0)                                                                              |
| Previous spine surgery                                                   | 37.8 (7.7)***                | 17.8 (86.6)                                                                              |
| Country of birth: Europe, not Sweden (ref: Sweden)                       | 0.2 (2.4)                    | 0.4 (2.8)                                                                                |

|                                                                     |              |              |
|---------------------------------------------------------------------|--------------|--------------|
| Country of birth: Other (ref: Sweden)                               | -4.4 (2.1)** | -1.9 (2.2)   |
| Education level: Secondary school (ref: primary school)             | 1.0 (2.2)    | -11.7 (11.8) |
| Education level: Post-secondary/post-graduate (ref: primary school) | -2.8 (2.2)   | 4.0 (2.3)*   |
| Yearly income (€)                                                   | -0.4 (1.2)   | 6.4 (18.6)   |
| Unemployed                                                          | -1.8 (1.7)   | 20.8 (8.8)** |

**Supplementary Table 3. Sensitivity analysis: Including only disability pension**

| Variable                                                                 | Coefficient (standard error) | Interaction effect of potential predictors & treatment effect (predictor* $\tau_{DID}$ ) |
|--------------------------------------------------------------------------|------------------------------|------------------------------------------------------------------------------------------|
| SCS group effect, $\beta_2$                                              | 38.2 (5.7)***                |                                                                                          |
| Period effect, $\beta_1$ (1 if after index date, 0 if before index date) | 0.5 (0.5)                    |                                                                                          |
| <b>Treatment effect, <math>\tau_{DID}</math></b>                         | <b>17.8 (3.3)***</b>         |                                                                                          |
| Calendar year                                                            | -4.8 (0.3)***                |                                                                                          |
| <b>Predictors</b>                                                        |                              |                                                                                          |
| Age                                                                      | 2.1 (0.1)***                 | 0.4 (0.3)                                                                                |
| Male                                                                     | -8.2 (2.1)***                | 2.7 (6.6)                                                                                |
| Comorbidities                                                            | 12.0 (1.8)***                | -0.7 (3.3)                                                                               |
| Any opioid use 3 months before index date                                | 19.7 (16.0)                  | 2.5 (8.5)                                                                                |
| Use of strong opioid 3 months before index date                          | -0.8 (13.9)                  | 12.4 (13.4)                                                                              |
| Use of weak opioid 3 months before index date                            | -7.5 (14.8)                  | -3.9 (9.2)                                                                               |
| Any non-opioid pain medicine use 3 months before index date              | 10.5 (5.6)*                  | -4.7 (7.6)                                                                               |
| Any anti-depression medicine use 3 months before index date              | 22.2 (4.6)***                | 9.4 (7.5)                                                                                |
| Previous spine surgery                                                   | -41.6 (8.1)***               | -1.8 (21.5)                                                                              |
| Country of birth: Europe, not Sweden (ref: Sweden)                       | -5.3 (4.2)                   | -6.2 (13.0)                                                                              |
| Country of birth: Other (ref: Sweden)                                    | -32.6 (4.3)***               | -19.1 (12.6)                                                                             |
| Education level: Secondary school (ref: primary school)                  | -21.4 (4.1)***               | 23.5 (9.4)*                                                                              |
| Education level: Post-secondary/post-graduate (ref: primary school)      | -33.0 (4.0)***               | 15.5 (10.6)                                                                              |
| Yearly income (€)                                                        | -2.7 (2.1)                   | 12.1 (22.0)                                                                              |
| Unemployed                                                               | 75.2 (3.2)***                | -7.8 (6.6)                                                                               |

**Supplementary Table 4. Sensitivity analysis: comparing month 36-25 before index date with month 25-36 after index date**

| Variable                                                                 | Coefficient (standard error) | Interaction effect of potential predictors & treatment effect (predictor* $\tau_{DID}$ ) |
|--------------------------------------------------------------------------|------------------------------|------------------------------------------------------------------------------------------|
| SCS group effect, $\beta_2$                                              | 91.9 (5.9)***                |                                                                                          |
| Period effect, $\beta_1$ (1 if after index date, 0 if before index date) | 0.5 (0.9)                    |                                                                                          |

|                                                                     |                  |                |
|---------------------------------------------------------------------|------------------|----------------|
| <b>Treatment effect, <math>\tau_{DID}</math></b>                    | <b>1.2 (4.6)</b> |                |
| Calendar year                                                       | -4.7(0.4)***     |                |
| <b>Predictors</b>                                                   |                  |                |
| Age                                                                 | 2.1 (0.1)***     | -0.4 (0.5)     |
| Male                                                                | -11.3 (2.1)***   | -1.9 (9.3)     |
| Comorbidities                                                       | 14.5 (1.8)***    | 0.4 (4.4)      |
| Any opioid use 3 months before index date                           | 43.0 (15.3)**    | -1.8 (13.0)    |
| Use of strong opioid 3 months before index date                     | -19.9 (13.3)     | -13.1 (29.3)   |
| Use of weak opioid 3 months before index date                       | -20.4 (13.9)     | 4.0 (13.5)     |
| Any non-opioid pain medicine use 3 months before index date         | 20.3 (5.6)***    | 16.4 (11.7)    |
| Any anti-depression medicine use 3 months before index date         | 38.2 (4.7)***    | 23.2 (10.8)**  |
| Previous spine surgery                                              | -4.4 (8.4)       | 61.0 (72.4)    |
| Country of birth: Europe, not Sweden (ref: Sweden)                  | -4.6 (4.3)       | 1.3 (3.3)      |
| Country of birth: Other (ref: Sweden)                               | -37.7 (4.4)***   | 1.8 (2.9)      |
| Education level: Secondary school (ref: primary school)             | -18.7 (4.1)***   | 29.4 (13.0)**  |
| Education level: Post-secondary/post-graduate (ref: primary school) | -35.8 (4.1)***   | 42.7 (14.9)*** |
| Yearly income (€)                                                   | -3.4 (1.9)       | 18.9 (16.9)    |
| Unemployed                                                          | 72.6 (3.2)***    | -1.1 (9.4)     |

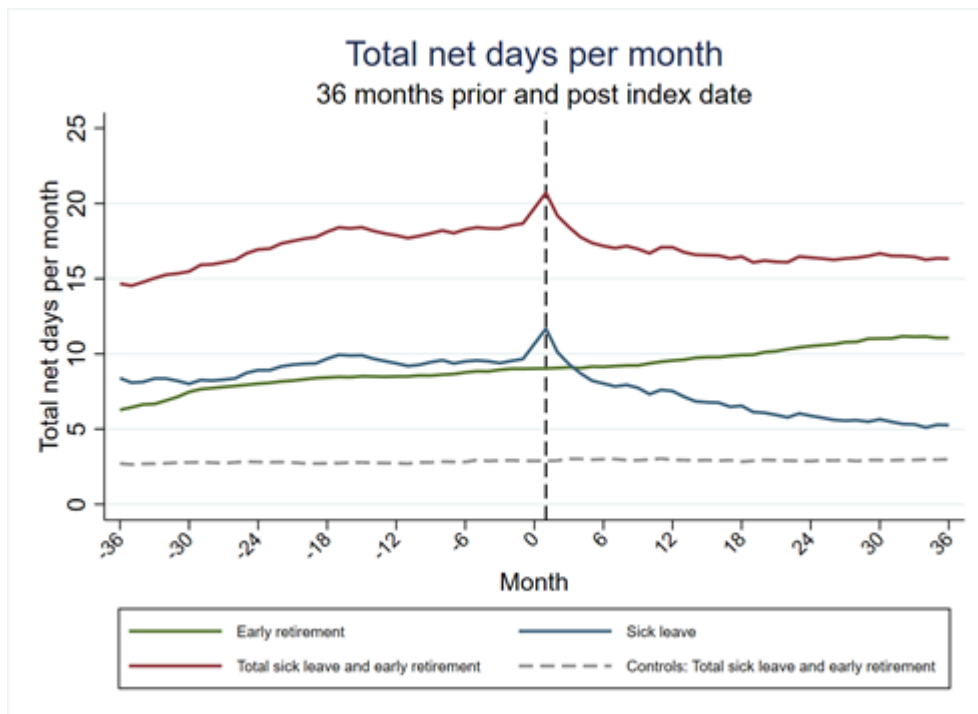

**Supplementary Figure 1. Sensitivity analysis, total net days of sick leave and early retirement 36 months before and after index date**
